# Supplementary material for: Evolutionary History and Taxonomic Reclassification of the Critically Endangered Daggernose Shark, a Species Endemic to the Western Atlantic
Source: Hindawi journal article supplement (doi:10.1155/2023/4798805), 2023-03-20
Supplement: f8 [file 4798805.f8.docx]

Supplementary Table S1 – Genetic distance (%) matrix for the species of the family Carcharhinidae based on the mtDNA dataset. The p distances are presented below the diagonal, while the corrected distances (GTR+G (0.5093)+I (0.4665)) are shown above the diagonal, in bold script

|  |  | 1 | 2 | 3 | 4 | 5 | 6 | 7 | 8 | 9 | 10 | 11 | 12 | 13 | 14 | 15 | 16 | 17 | 18 | 19 | 20 | 21 | 22 | 23 | 24 | 25 | 26 | 27 | 28 | 29 |
| --- | --- | --- | --- | --- | --- | --- | --- | --- | --- | --- | --- | --- | --- | --- | --- | --- | --- | --- | --- | --- | --- | --- | --- | --- | --- | --- | --- | --- | --- | --- |
| 1 | I_oxy |  | **5,8** | **7,5** | **6,9** | **7,6** | **7,1** | **7,0** | **7,0** | **6,8** | **8,7** | **5,8** | **7,2** | **6,7** | **7,7** | **8,4** | **8,8** | **9,8** | **9,9** | **9,9** | **10,0** | **10,1** | **10,1** | **10,5** | **12,9** | **12,9** | **14,5** | **15,2** | **18,9** | **19,3** |
| 2 | C_acr | 4,8 |  | **6,0** | **6,2** | **6,7** | **5,8** | **5,9** | **6,9** | **6,0** | **7,2** | **4,5** | **6,3** | **5,1** | **7,1** | **7,5** | **8,5** | **9,9** | **9,4** | **9,5** | **9,7** | **9,8** | **9,6** | **9,9** | **12,0** | **13,1** | **13,9** | **13,3** | **18,5** | **18,8** |
| 3 | C_fal | 5,8 | 4,9 |  | **6,7** | **6,3** | **6,0** | **5,4** | **8,3** | **5,3** | **6,7** | **5,2** | **6,2** | **5,1** | **6,8** | **6,0** | **8,6** | **8,7** | **8,7** | **9,2** | **9,0** | **9,1** | **9,9** | **9,5** | **11,5** | **12,9** | **15,0** | **14,5** | **20,2** | **20,8** |
| 4 | C_leu | 5,5 | 5,1 | 5,4 |  | **6,9** | **6,3** | **6,3** | **7,5** | **6,3** | **7,2** | **5,6** | **6,4** | **5,6** | **7,4** | **7,9** | **8,9** | **10,4** | **10,1** | **10,1** | **10,1** | **10,2** | **9,9** | **10,2** | **12,4** | **13,8** | **15,1** | **14,8** | **19,2** | **19,6** |
| 5 | C_lim | 6,1 | 5,5 | 5,2 | 5,6 |  | **7,9** | **6,8** | **8,6** | **6,8** | **1,4** | **6,4** | **6,6** | **6,2** | **7,3** | **7,8** | **8,4** | **10,3** | **9,7** | **10,2** | **10,3** | **10,2** | **10,2** | **10,2** | **11,9** | **13,1** | **14,2** | **13,9** | **18,5** | **18,7** |
| 6 | C_per | 5,7 | 4,8 | 4,9 | 5,1 | 6,2 |  | **6,2** | **8,2** | **6,1** | **8,1** | **5,7** | **6,7** | **4,2** | **6,7** | **7,7** | **8,8** | **10,3** | **10,3** | **10,1** | **10,1** | **10,2** | **10,0** | **10,2** | **12,8** | **14,3** | **15,6** | **15,2** | **20,9** | **20,9** |
| 7 | C_plu | 5,6 | 4,9 | 4,5 | 5,2 | 5,6 | 5,1 |  | **7,9** | **0,4** | **7,1** | **5,2** | **6,1** | **5,2** | **6,7** | **6,5** | **8,3** | **9,1** | **8,9** | **9,1** | **9,1** | **9,2** | **9,4** | **9,5** | **11,9** | **12,8** | **14,2** | **14,2** | **17,6** | **17,6** |
| 8 | C_por | 5,6 | 5,6 | 6,4 | 5,9 | 6,7 | 6,3 | 6,2 |  | **8,0** | **8,8** | **6,8** | **7,6** | **6,9** | **9,0** | **9,4** | **10,3** | **10,2** | **10,5** | **9,9** | **10,0** | **10,1** | **10,3** | **9,7** | **13,9** | **14,2** | **14,9** | **13,4** | **19,3** | **19,7** |
| 9 | C_alt | 5,5 | 5,0 | 4,4 | 5,2 | 5,6 | 5,0 | 0,4 | 6,3 |  | **7,2** | **5,2** | **5,9** | **5,1** | **6,8** | **6,9** | **8,0** | **9,1** | **9,0** | **8,9** | **8,8** | **8,8** | **9,3** | **9,3** | **11,9** | **12,6** | **14,5** | **14,0** | **17,7** | **17,7** |
| 10 | C_amb | 6,8 | 5,8 | 5,4 | 5,8 | 1,4 | 6,4 | 5,8 | 6,8 | 5,9 |  | **6,8** | **7,1** | **6,2** | **7,5** | **7,9** | **8,9** | **10,8** | **10,6** | **10,8** | **10,9** | **10,8** | **10,8** | **10,6** | **12,0** | **13,9** | **14,8** | **14,2** | **19,0** | **19,3** |
| 11 | C_bre | 4,8 | 3,9 | 4,4 | 4,7 | 5,3 | 4,7 | 4,4 | 5,5 | 4,4 | 5,5 |  | **5,4** | **4,2** | **6,9** | **6,9** | **7,6** | **8,7** | **9,1** | **9,4** | **9,5** | **9,6** | **9,0** | **9,3** | **11,2** | **11,7** | **14,8** | **13,5** | **18,5** | **19,0** |
| 12 | C_mac | 5,8 | 5,2 | 5,0 | 5,2 | 5,4 | 5,4 | 5,0 | 6,0 | 4,9 | 5,8 | 4,5 |  | **4,9** | **7,3** | **8,0** | **8,3** | **9,3** | **9,2** | **9,6** | **9,7** | **9,7** | **8,9** | **9,2** | **11,7** | **12,6** | **15,2** | **13,5** | **18,6** | **20,0** |
| 13 | C_obs | 5,4 | 4,4 | 4,3 | 4,7 | 5,1 | 3,7 | 4,4 | 5,5 | 4,3 | 5,1 | 3,6 | 4,2 |  | **5,7** | **6,1** | **7,7** | **9,0** | **9,2** | **8,8** | **8,8** | **8,9** | **8,4** | **8,9** | **11,5** | **12,2** | **14,7** | **13,2** | **18,9** | **19,2** |
| 14 | C_sor | 6,0 | 5,7 | 5,4 | 5,9 | 5,8 | 5,4 | 5,4 | 6,8 | 5,4 | 6,0 | 5,6 | 5,8 | 4,7 |  | **8,1** | **9,8** | **10,1** | **10,1** | **9,9** | **9,8** | **9,9** | **10,1** | **10,3** | **13,4** | **14,5** | **15,3** | **15,6** | **22,1** | **22,7** |
| 15 | P_gla | 6,4 | 5,9 | 4,8 | 6,2 | 6,1 | 6,0 | 5,3 | 7,0 | 5,5 | 6,2 | 5,5 | 6,3 | 5,0 | 6,3 |  | **9,7** | **10,8** | **10,5** | **11,0** | **10,8** | **10,8** | **10,6** | **10,6** | **12,6** | **13,1** | **15,7** | **15,2** | **19,2** | **19,7** |
| 16 | T_obe | 6,6 | 6,5 | 6,5 | 6,7 | 6,5 | 6,6 | 6,3 | 7,5 | 6,1 | 6,8 | 5,9 | 6,4 | 6,0 | 7,2 | 7,2 |  | **12,0** | **11,6** | **11,9** | **12,1** | **12,1** | **12,2** | **11,9** | **13,3** | **14,6** | **17,3** | **16,4** | **20,9** | **21,1** |
| 17 | L_tem | 7,4 | 7,1 | 6,6 | 7,5 | 7,3 | 7,6 | 6,8 | 7,6 | 6,9 | 7,9 | 6,9 | 7,0 | 7,0 | 7,5 | 7,7 | 8,2 |  | **1,7** | **6,7** | **6,8** | **6,8** | **7,1** | **7,0** | **13,1** | **14,4** | **16,7** | **14,9** | **19,3** | **20,3** |
| 18 | L_tep | 7,3 | 7,4 | 6,7 | 7,7 | 7,7 | 7,6 | 7,0 | 7,5 | 7,0 | 8,0 | 6,7 | 7,1 | 6,9 | 7,5 | 7,9 | 8,6 | 1,6 |  | **7,0** | **7,1** | **7,2** | **7,1** | **6,8** | **13,6** | **14,9** | **17,3** | **15,3** | **20,2** | **21,4** |
| 19 | G_fow | 7,4 | 7,2 | 6,9 | 7,5 | 7,7 | 7,5 | 6,9 | 7,3 | 6,8 | 8,0 | 7,2 | 7,3 | 6,8 | 7,4 | 7,9 | 8,4 | 5,6 | 5,4 |  | **0,4** | **0,4** | **4,5** | **4,9** | **13,4** | **14,5** | **15,2** | **16,5** | **20,6** | **22,0** |
| 20 | G_sia | 7,5 | 7,3 | 6,8 | 7,6 | 7,7 | 7,6 | 7,0 | 7,5 | 6,8 | 8,1 | 7,2 | 7,3 | 6,8 | 7,3 | 7,8 | 8,5 | 5,7 | 5,4 | 0,4 |  | **0,1** | **4,6** | **5,1** | **13,4** | **14,4** | **15,0** | **16,6** | **20,6** | **22,0** |
| 21 | G_gan | 7,5 | 7,4 | 6,8 | 7,6 | 7,7 | 7,6 | 7,0 | 7,5 | 6,8 | 8,0 | 7,3 | 7,3 | 6,8 | 7,3 | 7,9 | 8,5 | 5,7 | 5,5 | 0,4 | 0,1 |  | **4,7** | **5,1** | **13,4** | **14,5** | **15,1** | **16,7** | **20,7** | **22,1** |
| 22 | G_gly | 7,5 | 7,3 | 7,4 | 7,4 | 7,7 | 7,5 | 7,2 | 7,6 | 7,1 | 8,0 | 6,9 | 6,8 | 6,5 | 7,5 | 7,7 | 8,6 | 5,7 | 5,7 | 3,9 | 4,0 | 4,0 |  | **3,3** | **13,1** | **14,4** | **15,1** | **15,9** | **20,6** | **22,5** |
| 23 | G_gar | 7,8 | 7,4 | 7,1 | 7,6 | 7,6 | 7,6 | 7,2 | 7,2 | 7,1 | 7,9 | 7,1 | 7,0 | 6,8 | 7,6 | 7,7 | 8,4 | 5,4 | 5,6 | 4,2 | 4,3 | 4,4 | 3,0 |  | **13,1** | **14,6** | **15,4** | **15,7** | **20,2** | **21,3** |
| 24 | R_la | 8,7 | 8,4 | 8,0 | 8,5 | 8,3 | 8,8 | 8,3 | 9,2 | 8,3 | 8,4 | 7,9 | 8,2 | 8,1 | 9,0 | 8,5 | 8,9 | 9,2 | 8,9 | 9,0 | 9,0 | 9,0 | 8,9 | 8,8 |  | **3,2** | **15,5** | **12,5** | **17,8** | **18,2** |
| 25 | R_po | 8,6 | 8,9 | 8,6 | 9,2 | 8,9 | 9,4 | 8,6 | 9,3 | 8,6 | 9,2 | 8,0 | 8,6 | 8,3 | 9,4 | 8,6 | 9,5 | 9,8 | 9,5 | 9,5 | 9,4 | 9,4 | 9,4 | 9,5 | 2,8 |  | **17,2** | **13,2** | **18,0** | **18,4** |
| 26 | G_cur | 9,5 | 9,2 | 9,7 | 9,8 | 9,5 | 10,1 | 9,5 | 9,6 | 9,6 | 9,8 | 9,6 | 10,0 | 9,7 | 9,9 | 10,0 | 10,7 | 10,9 | 10,7 | 9,8 | 9,7 | 9,8 | 9,8 | 10,0 | 9,8 | 10,5 |  | **18,9** | **21,9** | **23,0** |
| 27 | L_mac | 9,8 | 9,0 | 9,5 | 9,7 | 9,3 | 9,8 | 9,5 | 8,9 | 9,3 | 9,5 | 9,0 | 9,0 | 8,9 | 10,0 | 9,8 | 10,4 | 9,9 | 9,8 | 10,4 | 10,4 | 10,5 | 10,1 | 10,0 | 8,6 | 8,9 | 11,3 |  | **16,6** | **17,5** |
| 28 | S_lat | 11,1 | 11,0 | 11,5 | 11,3 | 11,1 | 12,0 | 10,5 | 11,2 | 10,6 | 11,3 | 10,9 | 11,0 | 11,1 | 12,4 | 11,2 | 11,9 | 11,6 | 11,3 | 11,8 | 11,8 | 11,8 | 11,7 | 11,7 | 10,8 | 10,8 | 12,2 | 10,4 |  | **1,8** |
| 29 | S_mac | 11,2 | 11,0 | 11,7 | 11,4 | 11,0 | 11,8 | 10,4 | 11,2 | 10,5 | 11,3 | 11,0 | 11,4 | 11,1 | 12,5 | 11,3 | 11,8 | 12,0 | 11,6 | 12,3 | 12,3 | 12,3 | 12,4 | 12,0 | 10,7 | 10,7 | 12,5 | 10,7 | 1,7 |  |
