# Supplementary material for: Evolutionary History and Taxonomic Reclassification of the Critically Endangered Daggernose Shark, a Species Endemic to the Western Atlantic
Source: Hindawi journal article supplement (doi:10.1155/2023/4798805), 2023-03-20
Supplement: f9 [file 4798805.f9.docx]

Supplementary Table S2 – Genetic distance (%) matrix for the species of the family Carcharhinidae based on the RAG1 dataset. The p distances are presented below the diagonal, while the corrected distances (TN93+G (0.0963)) are shown above the diagonal, in bold script.

|  |  | 1 | 2 | 3 | 4 | 5 | 6 | 7 | 8 | 9 | 10 | 11 | 12 |
| --- | --- | --- | --- | --- | --- | --- | --- | --- | --- | --- | --- | --- | --- |
| 1 | *I. oxyrhyncus* |  | **0,6** | **0,7** | **0,7** | **0,9** | **1,0** | **1,0** | **1,2** | **1,6** | **4,5** | **4,9** | **5,0** |
| 2 | *C. limbatus* | 0,5 |  | **0,5** | **0,5** | **0,7** | **0,8** | **0,8** | **0,8** | **1,4** | **4,2** | **4,6** | **4,7** |
| 3 | *C. falciformis* | 0,6 | 0,5 |  | **0,6** | **0,8** | **0,7** | **0,9** | **1,2** | **1,5** | **4,4** | **4,8** | **4,9** |
| 4 | *C. leucas* | 0,6 | 0,5 | 0,5 |  | **0,8** | **0,9** | **0,9** | **1,1** | **1,5** | **4,2** | **4,4** | **4,6** |
| 5 | *C. perezi* | 0,8 | 0,6 | 0,7 | 0,7 |  | **1,1** | **1,1** | **1,3** | **1,7** | **4,6** | **4,6** | **4,8** |
| 6 | *C. acronotus* | 0,9 | 0,7 | 0,6 | 0,8 | 1,0 |  | **1,2** | **1,5** | **1,8** | **4,9** | **5,2** | **5,4** |
| 7 | *C. plumbeus* | 0,9 | 0,7 | 0,8 | 0,8 | 1,0 | 1,1 |  | **1,2** | **1,3** | **4,5** | **4,4** | **5,0** |
| 8 | *C. porosus* | 1,1 | 0,7 | 1,0 | 1,0 | 1,2 | 1,3 | 1,1 |  | **1,6** | **5,0** | **5,5** | **5,6** |
| 9 | *P. glauca* | 1,4 | 1,2 | 1,3 | 1,3 | 1,4 | 1,5 | 1,2 | 1,4 |  | **3,1** | **4,1** | **4,3** |
| 10 | *G. cuvier* | 3,2 | 3,1 | 3,2 | 3,1 | 3,3 | 3,4 | 3,2 | 3,4 | 2,4 |  | **4,6** | **4,7** |
| 11 | *R. lalandii* | 3,3 | 3,2 | 3,2 | 3,1 | 3,2 | 3,5 | 3,2 | 3,5 | 2,9 | 3,2 |  | **0,5** |
| 12 | *R. porosus* | 3,4 | 3,2 | 3,3 | 3,2 | 3,3 | 3,6 | 3,4 | 3,6 | 3,0 | 3,3 | 0,5 |  |
