# Supplementary figures and images for: Evolutionary History and Taxonomic Reclassification of the Critically Endangered Daggernose Shark, a Species Endemic to the Western Atlantic
Source: Hindawi journal article supplement (doi:10.1155/2023/4798805), 2023-03-20

### RAG1

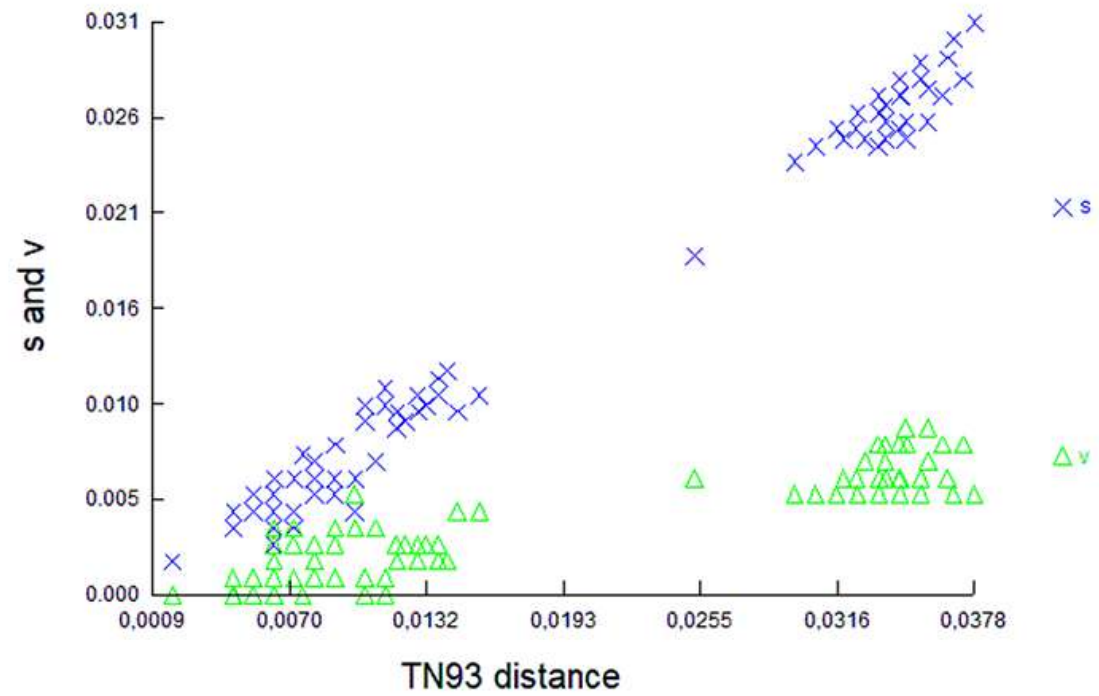

### mtDNA

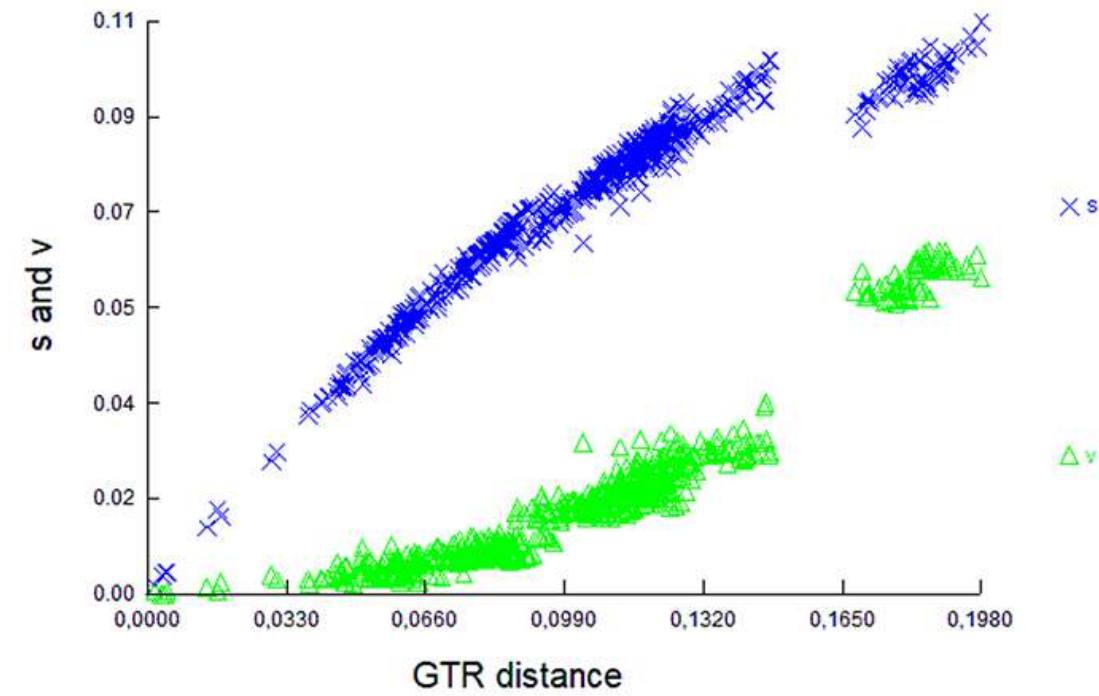

Supplement: f1 [file 4798805.f1.pdf]

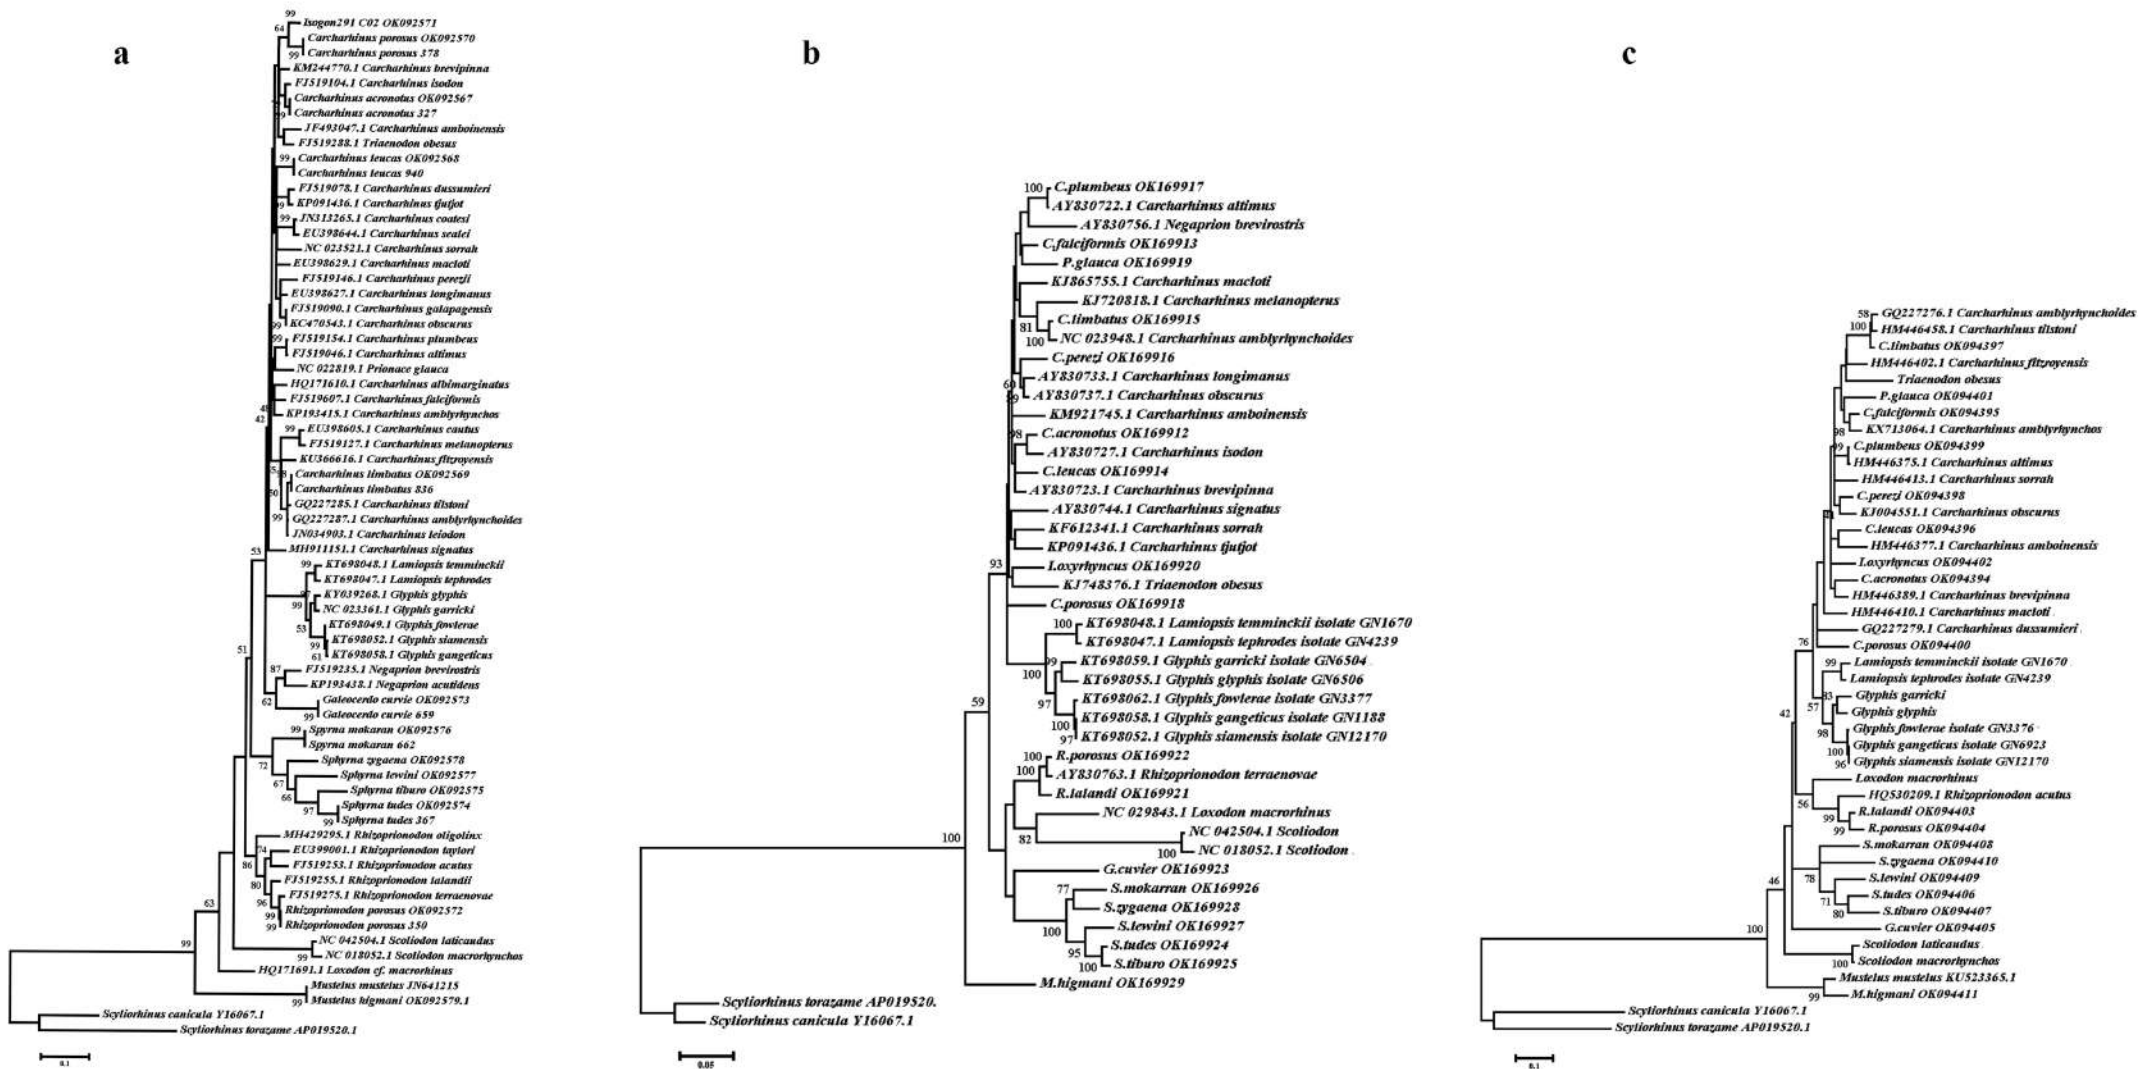

Supplement: f2 [file 4798805.f2.pdf]

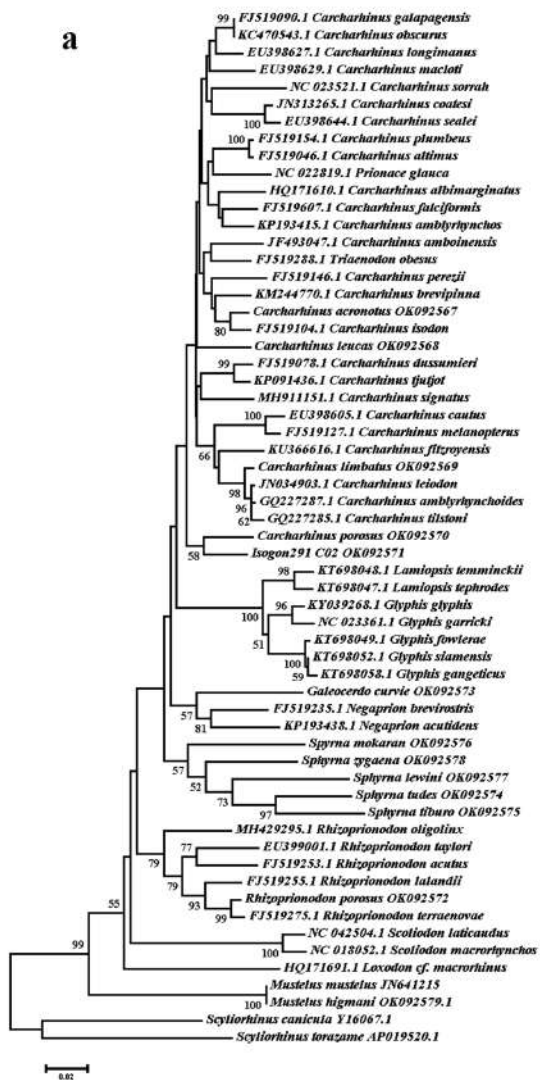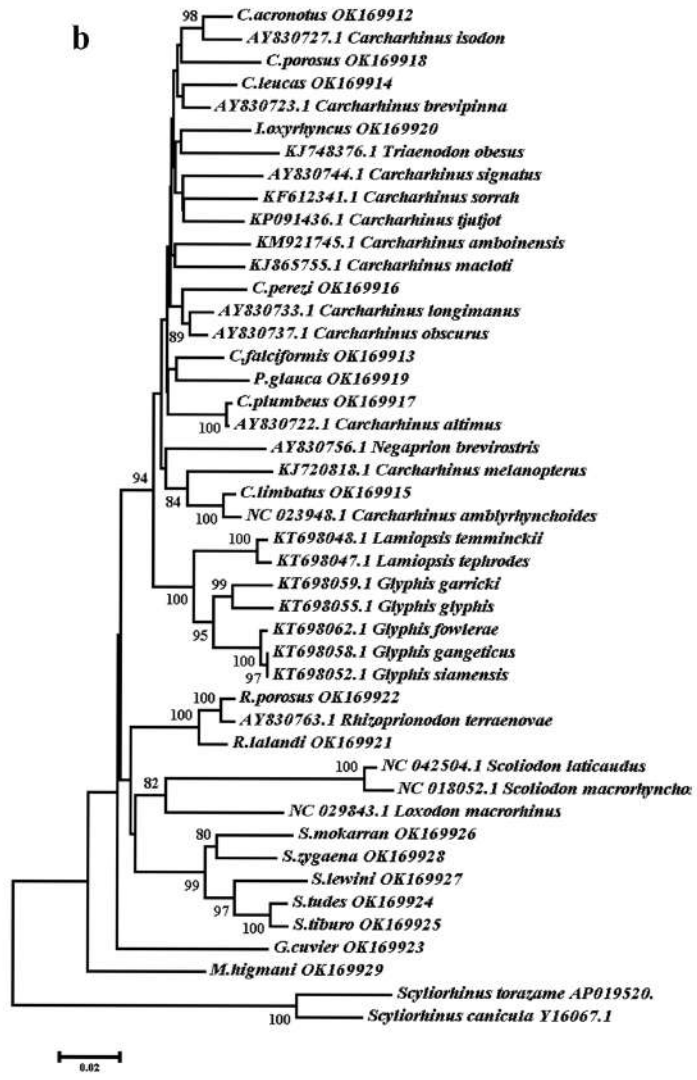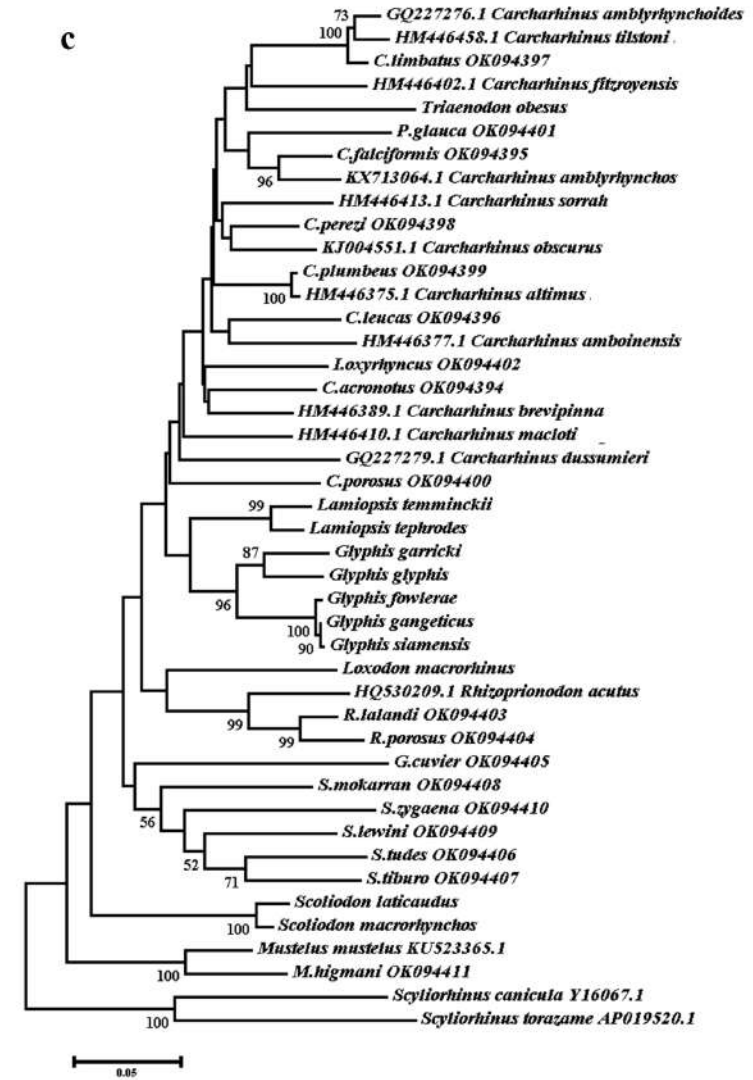

Supplement: f3 [file 4798805.f3.pdf]

**a**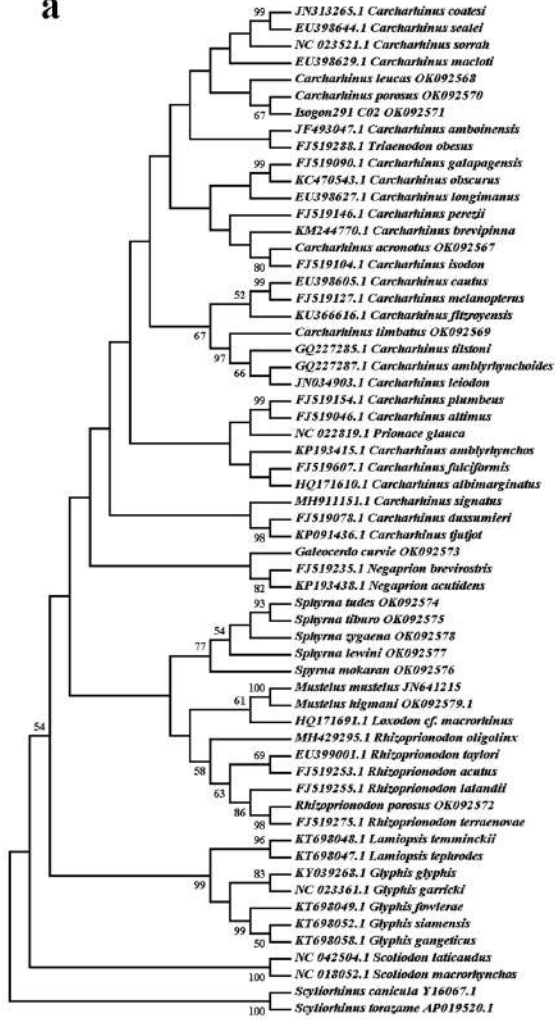**b**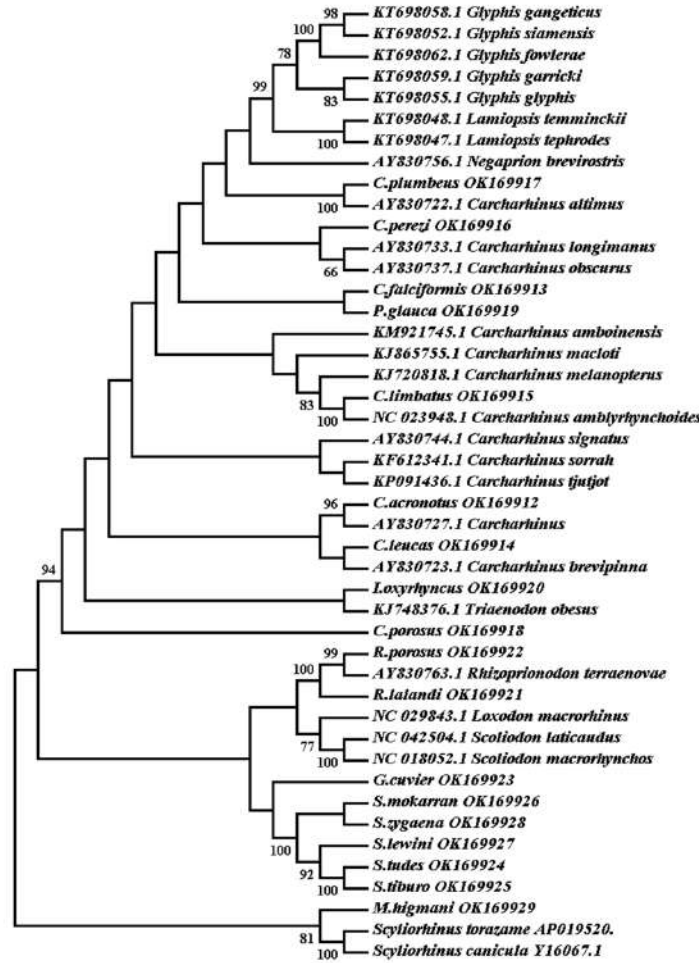**c**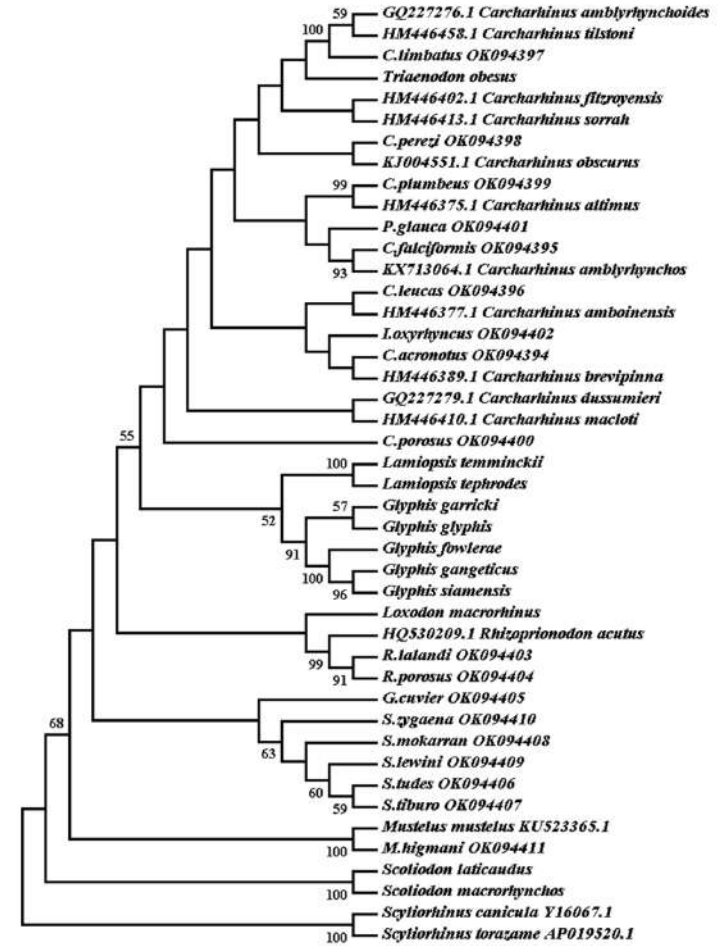

Supplement: f5 [file 4798805.f5.pdf]

ML

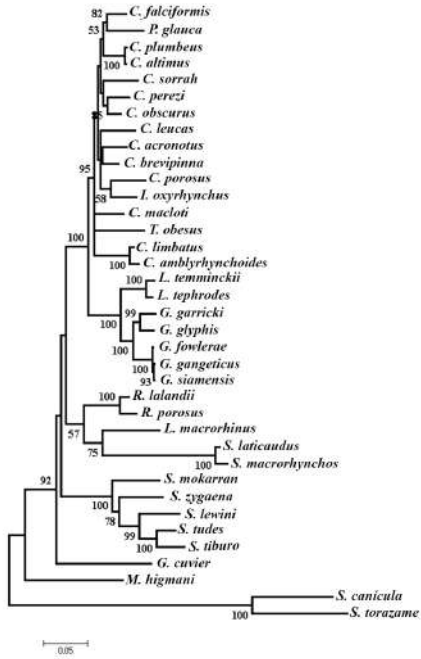

NJ

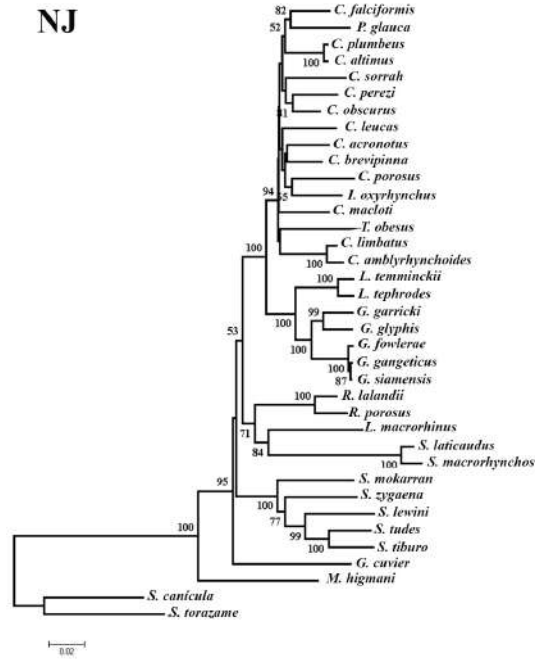

MP

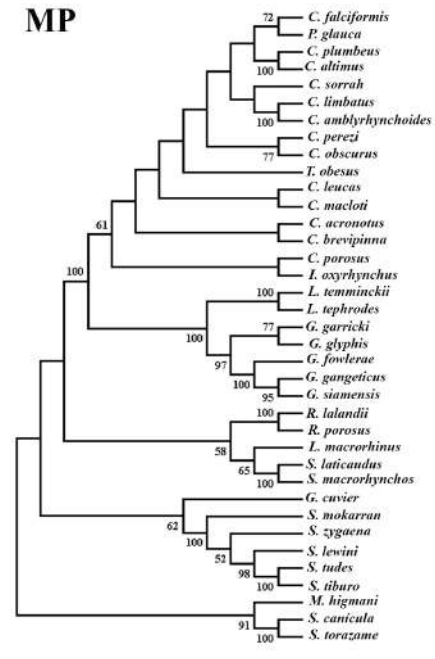

BI

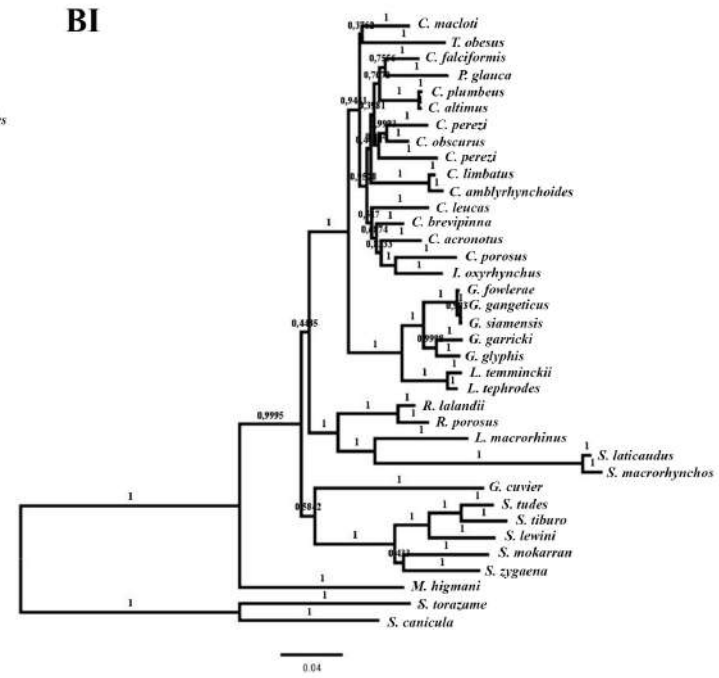

Supplement: f6 [file 4798805.f6.pdf]

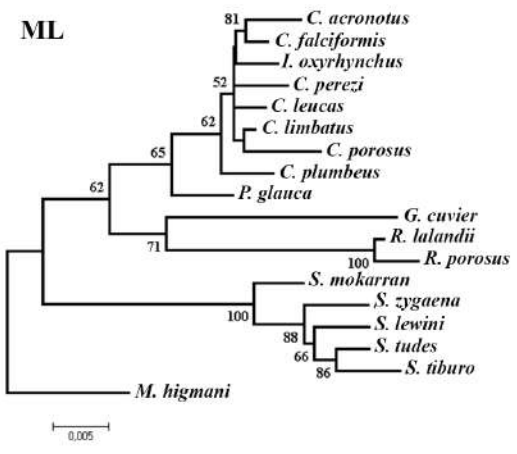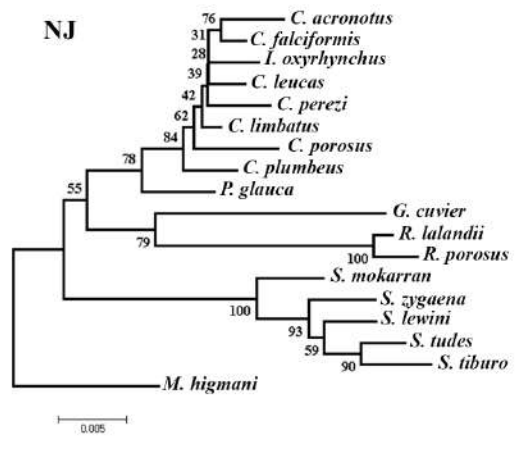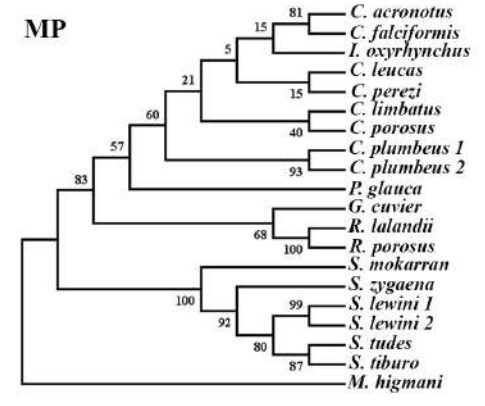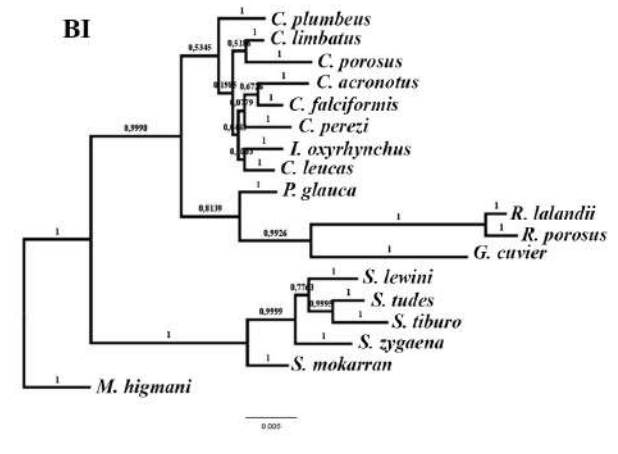

Supplement: f7 [file 4798805.f7.pdf]
